# Supplementary material for: How useful is molecular modelling in combination with ion mobility mass spectrometry for ‘small molecule’ ion mobility collision cross-sections?
Source: Royal Society of Chemistry journal article supplement (doi:10.1039/c5an00411j), 2015-01-01
Supplement: c5an00411j1.pdf [file c5an00411j1.pdf]

Electronic Supplementary Information for Analyst

## How useful is molecular modelling in combination with ion mobility mass spectrometry for ‘small molecule’ ion mobility collision cross sections?

Cris Laphorn<sup>\*a</sup>, Frank Pullen<sup>a</sup>, Babur Z. Chowdhry<sup>a</sup>, Patricia Wright<sup>a</sup>, George Perkins<sup>b</sup> and Yanira Heredia<sup>c</sup>

<sup>a</sup> Faculty of Engineering & Science, University of Greenwich, Medway Campus, Chatham, Kent ME4 4TB, UK

<sup>b</sup> 149 Hickory Corner Road, Milford, NJ

<sup>c</sup> Department of Hematology. Hospital 12 de Octubre. Instituto de Investigación 12 de Octubre, Madrid, Spain.

\* Corresponding author: E-mail: lc73@gre.ac.uk

### Experimental data for nitrogen-parameterised calibration set

| Name                                 | eCCS1  | eCCS2  | eCCS3  | Mean   | Std Dev | % RSD |
|--------------------------------------|--------|--------|--------|--------|---------|-------|
| N-ethylaniline                       | 126.81 | 126.84 | 126.64 | 126.76 | 0.11    | 0.09% |
| Acetaminophen                        | 129.89 | 128.76 | 128.94 | 129.20 | 0.61    | 0.47% |
| Pregabalin                           | 137.85 | 137.88 | 137.85 | 137.86 | 0.02    | 0.01% |
| Ephedrine                            | 135.59 | 135.60 | 135.67 | 135.62 | 0.04    | 0.03% |
| Phenacetin                           | 139.34 | 139.31 | 139.30 | 139.32 | 0.02    | 0.01% |
| Naproxen                             | 150.32 | 150.37 | 150.42 | 150.37 | 0.05    | 0.03% |
| Alprenolol                           | 159.58 | 158.68 | 158.77 | 159.01 | 0.50    | 0.31% |
| 5-(p-methylphenyl)-5-phenylhydantoin | 163.54 | 163.52 | 163.54 | 163.53 | 0.01    | 0.01% |
| Trimethoprim                         | 169.87 | 169.78 | 169.93 | 169.86 | 0.08    | 0.04% |
| Ondansetron                          | 170.06 | 169.26 | 169.29 | 169.54 | 0.45    | 0.27% |
| Cinchonine                           | 166.54 | 166.46 | 166.19 | 166.40 | 0.18    | 0.11% |
| Sulpiride                            | 182.91 | 182.84 | 183.07 | 182.94 | 0.12    | 0.06% |
| Clozapine N-oxide                    | 180.31 | 179.95 | 179.91 | 180.06 | 0.22    | 0.12% |
| Cortisone                            | 184.04 | 184.19 | 183.90 | 184.04 | 0.15    | 0.08% |
| Trichlormethiazide                   | 176.05 | 176.28 | 175.96 | 176.10 | 0.17    | 0.09% |
| Amlodipine                           | 189.48 | 189.33 | 189.06 | 189.29 | 0.21    | 0.11% |
| Doxazosin                            | 205.68 | 205.69 | 205.31 | 205.56 | 0.22    | 0.11% |
| Verapamil                            | 212.14 | 211.59 | 211.75 | 211.83 | 0.28    | 0.13% |
| Sildenafil                           | 213.57 | 213.43 | 213.01 | 213.34 | 0.29    | 0.14% |
| Reserpine                            | 255.93 | 255.98 | 256.18 | 256.03 | 0.13    | 0.05% |

**Experimental data for helium-parameterised calibration set**

| <b>Name</b>                          | <b>eCCS1</b> | <b>eCCS2</b> | <b>eCCS3</b> | <b>Mean</b> | <b>Std Dev</b> | <b>% RSD</b> |
|--------------------------------------|--------------|--------------|--------------|-------------|----------------|--------------|
| N-ethylaniline                       | 71.93        | 71.95        | 71.81        | 71.90       | 0.08           | 0.11%        |
| Acetaminophen                        | 74.54        | 73.72        | 73.85        | 74.04       | 0.44           | 0.60%        |
| Ephedrine                            | 78.46        | 78.47        | 78.51        | 78.48       | 0.03           | 0.03%        |
| Phenacetin                           | 80.22        | 80.21        | 80.19        | 80.21       | 0.02           | 0.02%        |
| Pregabalin                           | 80.26        | 80.28        | 80.26        | 80.27       | 0.01           | 0.01%        |
| Naproxen                             | 90.23        | 90.26        | 90.30        | 90.26       | 0.04           | 0.04%        |
| Alprenolol                           | 97.69        | 96.99        | 97.06        | 97.25       | 0.39           | 0.40%        |
| 5-(p-methylphenyl)-5-phenylhydantoin | 100.55       | 100.53       | 100.55       | 100.54      | 0.01           | 0.01%        |
| Cinchonine                           | 102.04       | 101.97       | 101.76       | 101.92      | 0.15           | 0.14%        |
| Trimethoprim                         | 105.98       | 104.89       | 106.03       | 105.63      | 0.64           | 0.61%        |
| Ondansetron                          | 106.15       | 105.51       | 105.53       | 105.73      | 0.36           | 0.34%        |
| Trichlormethiazide                   | 110.01       | 110.21       | 109.95       | 110.06      | 0.14           | 0.12%        |
| Clozapine N-oxide                    | 114.45       | 114.26       | 114.22       | 114.31      | 0.12           | 0.11%        |
| Sulpiride                            | 115.97       | 116.35       | 116.53       | 116.28      | 0.29           | 0.25%        |
| Cortisone                            | 117.38       | 117.51       | 117.28       | 117.39      | 0.12           | 0.10%        |
| Amlodipine                           | 122.06       | 121.94       | 121.72       | 121.91      | 0.17           | 0.14%        |
| Doxazosin                            | 134.96       | 134.96       | 134.64       | 134.85      | 0.19           | 0.14%        |
| Verapamil                            | 141.22       | 140.75       | 140.89       | 140.95      | 0.24           | 0.17%        |
| Sildenafil                           | 141.80       | 141.68       | 141.32       | 141.60      | 0.25           | 0.18%        |
| Reserpine                            | 179.86       | 179.90       | 180.09       | 179.95      | 0.12           | 0.07%        |
